# Supplementary material
Source: Royal Society of Chemistry journal article supplement (doi:10.1039/d5ma01349f)
Supplement: d5ma01349f1.pdf [file d5ma01349f1.pdf]

# Supporting Information

## Carbon Supported Nickel Sulphide Catalyts for Transfer Hydrogenation of Nitroarenes to Aryl amines

Ankit Kumar,<sup>a</sup> Pascal A. Roll,<sup>a</sup> Anna Stephan,<sup>a</sup> Claus Feldmann,<sup>a</sup> Arjun Neyyathala,<sup>a</sup> Paolo Dolcet,<sup>b</sup>  
and Schirin Hanf<sup>a\*</sup>

<sup>a</sup> Institute of Inorganic Chemistry, Karlsruhe Institute of Technology, Engesserstr. 15,  
76131 Karlsruhe, Germany

<sup>b</sup> Department of Chemical Sciences, University of Padova, Via Francesco Marzolo 1,  
Padova 35131, Italy

\*Corresponding author      Email: [Schirin.hanf@kit.edu](mailto:Schirin.hanf@kit.edu)

|                              |                 |
|------------------------------|-----------------|
| 1. Literature comparison     | page S2 – S3    |
| 2. Catalyst characterisation | page S2 – S6    |
| 3. G-MS analysis             | page S7 – S8    |
| 4. Catalytic test results    | pages S8 – S11  |
| 5. References                | pages S12 – S13 |

## 1. Literature comparison

| <b>Table S1.</b> Comparison of our catalyst with other reported catalysts for the hydrogenation of nitroarenes. |                                                         |                                                             |               |              |                  |                  |
|-----------------------------------------------------------------------------------------------------------------|---------------------------------------------------------|-------------------------------------------------------------|---------------|--------------|------------------|------------------|
| <b>entry</b>                                                                                                    | <b>catalyst</b>                                         | <b>H<sub>2</sub> source</b>                                 | <b>T (°C)</b> | <b>t (h)</b> | <b>yield (%)</b> | <b>reference</b> |
| 1                                                                                                               | Ni <sub>3</sub> S <sub>2</sub> /C                       | N <sub>2</sub> H <sub>4</sub> ·H <sub>2</sub> O (10 mmol)   | 70            | 6            | 91               | This work        |
| 2                                                                                                               | Co1/NPC                                                 | H <sub>2</sub> (30 bar)                                     | 110           | 1.5          | >99              | 1                |
| 3                                                                                                               | Co/MA-800                                               | H <sub>2</sub> (40 bar)                                     | 120           | 18           | 96               | 2                |
| 4                                                                                                               | Co/NC                                                   | H <sub>2</sub> (30 bar)                                     | 110           | 8            | 97.4             | 3                |
| 5                                                                                                               | Co@C/CNT                                                | N <sub>2</sub> H <sub>4</sub> ·H <sub>2</sub> O (2 mmol)    | 25            | 9            | 99               | 4                |
| 6                                                                                                               | Co-L@C-800                                              | N <sub>2</sub> H <sub>4</sub> ·H <sub>2</sub> O (0.48 mmol) | 50            | 6            | 99               | 5                |
| 7                                                                                                               | Co@C-800-AL                                             | Methanol                                                    | 140           | 24           | 95               | 6                |
| 8                                                                                                               | Co@NC/AC                                                | H <sub>2</sub> (10 bar)                                     | 110           | 4            | 99               | 7                |
| 9                                                                                                               | Co@NCT                                                  | N <sub>2</sub> H <sub>4</sub> ·H <sub>2</sub> O (1 mL)      | 40            | 0.34         | 99               | 8                |
| 10                                                                                                              | Co@NC-600                                               | Formic acid                                                 | 90            | 4            | 99.9             | 9                |
| 11                                                                                                              | Ni <sub>2</sub> P-AC                                    | N <sub>2</sub> H <sub>4</sub> ·H <sub>2</sub> O (0.5 mL)    | 70            | 2            | 93               | 10               |
| 12                                                                                                              | Ni-N-C-700                                              | H <sub>2</sub> (30 bar)                                     | 120           | 8            | 99               | 11               |
| 13                                                                                                              | Ni/C <sub>60</sub>                                      | H <sub>2</sub> (20 bar)                                     | 90            | 0.66         | 99               | 12               |
| 14                                                                                                              | Ni/SiO <sub>2</sub>                                     | N <sub>2</sub> H <sub>4</sub> ·H <sub>2</sub> O (2 mmol)    | 100           | 8            | 93.8             | 13               |
| 15                                                                                                              | Fe-Fe <sub>3</sub> C-Fe <sub>3</sub> O <sub>4</sub> @CN | N <sub>2</sub> H <sub>4</sub> ·H <sub>2</sub> O (1.6mmol)   | 85            | 9            | 95.2             | 14               |
| 16                                                                                                              | γ-Fe <sub>2</sub> O <sub>3</sub> /LRC-700               | H <sub>2</sub> (35 bar)                                     | 120           | 18           | 96               | 15               |
| 17                                                                                                              | Nano 2H-WS <sub>2</sub>                                 | H <sub>2</sub> (50 bar)                                     | 120           | 8            | 98               | 16               |
| 18                                                                                                              | NiCu/C@SiO <sub>2</sub> -800                            | H <sub>2</sub> (20 bar)                                     | 120           | 0.6          | >99              | 17               |
| 19                                                                                                              | ImmFe-IL                                                | N <sub>2</sub> H <sub>4</sub> ·H <sub>2</sub> O (3 mmol)    | 110           | 12           | 99               | 18               |
| 20                                                                                                              | FeS <sub>2</sub>                                        | N <sub>2</sub> H <sub>4</sub> ·H <sub>2</sub> O (20 mmol)   | 60            | -            | 99               | 19               |
| 21                                                                                                              | Fe@C                                                    | H <sub>2</sub> (11.5 bar)                                   | 100           | 0.67         | 99               | 20               |
| 22                                                                                                              | Cu/celite                                               | Ethylene glycol                                             | 100           | 1            | 97               | 21               |
| 23                                                                                                              | MoOx/ZSM-5                                              | H <sub>2</sub> (50 bar)                                     | 120           | 20           | 99               | 22               |
| 24                                                                                                              | Ru/PNC-700                                              | H <sub>2</sub> (10bar)                                      | 80            | 24           | 95               | 23               |
| 25                                                                                                              | Ru/OMC-800                                              | H <sub>2</sub> (40 bar)                                     | 50            | 2            | 99               | 24               |
| 26                                                                                                              | Ru/MoS <sub>2</sub>                                     | H <sub>2</sub> (30 bar)                                     | 100           | 2.5          | 94               | 25               |
| 27                                                                                                              | Ir-MoOx/SiO <sub>2</sub>                                | H <sub>2</sub> (10 bar)                                     | 50            | 0.5          | 99               | 26               |
| 28                                                                                                              | ZrO <sub>2</sub> @Pt                                    | H <sub>2</sub> (10 bar)                                     | 25            | 1            | 99               | 27               |
| 29                                                                                                              | Pt/CeO <sub>2</sub>                                     | H <sub>2</sub> (10 bar)                                     | 25            | 2            | 87               | 28               |
| 30                                                                                                              | Rh/COF                                                  | H <sub>2</sub> (1 bar)                                      | 25            | 19           | 99               | 29               |
| 31                                                                                                              | NiPd/TiO <sub>2</sub>                                   | H <sub>2</sub> (10 bar)                                     | 80            | 0.5          | 99               | 30               |

|                                                                                                                                                                                                                                                                                                                                                                                                                                                                                                                                                               |                       |                        |    |    |    |    |
|---------------------------------------------------------------------------------------------------------------------------------------------------------------------------------------------------------------------------------------------------------------------------------------------------------------------------------------------------------------------------------------------------------------------------------------------------------------------------------------------------------------------------------------------------------------|-----------------------|------------------------|----|----|----|----|
| 32                                                                                                                                                                                                                                                                                                                                                                                                                                                                                                                                                            | AuPd/TiO <sub>2</sub> | H <sub>2</sub> (3 bar) | 90 | 15 | 99 | 31 |
| <p>NPC (nitrogen- and phosphorous-doped carbon); MA-800 (macroalgae-derived carbon, carbonized at 800 °C); NC (nitrogen-doped carbon); CNT (carbon nanotube); L@C-800 (ligand-derived carbon, carbonized at 800 °C); AC (activated carbon); LRC-700 (lignin-derived carbon, carbonized at 700 °C); C@SiO<sub>2</sub>-800 (<i>In-situ</i> carbon supported silica, carbonised at 800 °C); IL (Ionic liquid); PNC-700 (phosphorous- and nitrogen-doped carbon); OMC-800 (ordered mesoporous carbon, carbonized at 800 °C); COF (Covalent organic framework)</p> |                       |                        |    |    |    |    |

## 2. Catalyst characterization

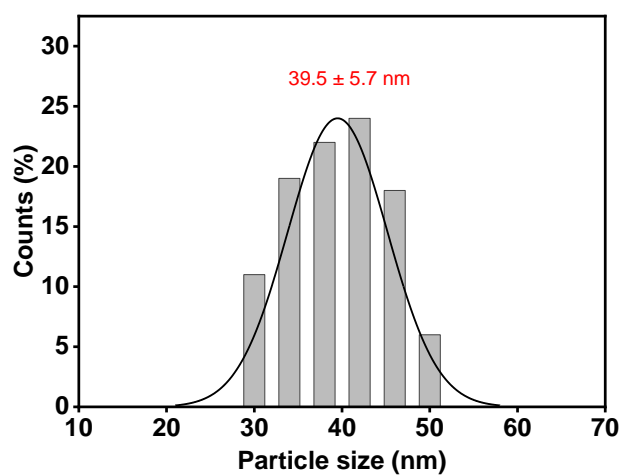

**Fig. S1.** Particle size distribution of Ni<sub>3</sub>S<sub>2</sub>/C, determined by TEM imaging.

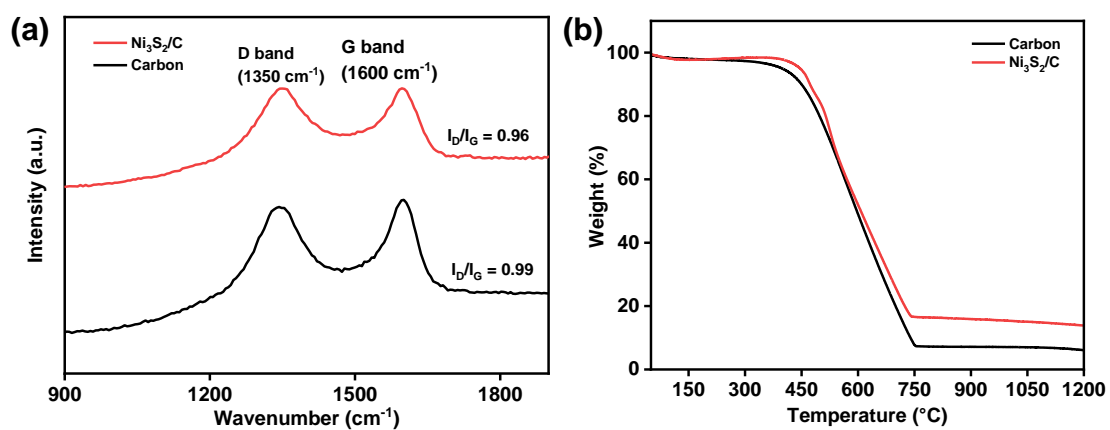

**Fig. S2.** (a) Raman spectra and (b) thermogravimetric analysis of carbon as support material and the Ni<sub>3</sub>S<sub>2</sub>/C catalyst. The Ni<sub>3</sub>S<sub>2</sub>/C catalyst exhibits a higher residual mass than the pristine carbon support, confirming the successful incorporation of thermally stable Ni<sub>3</sub>S<sub>2</sub> species over the carbon support.

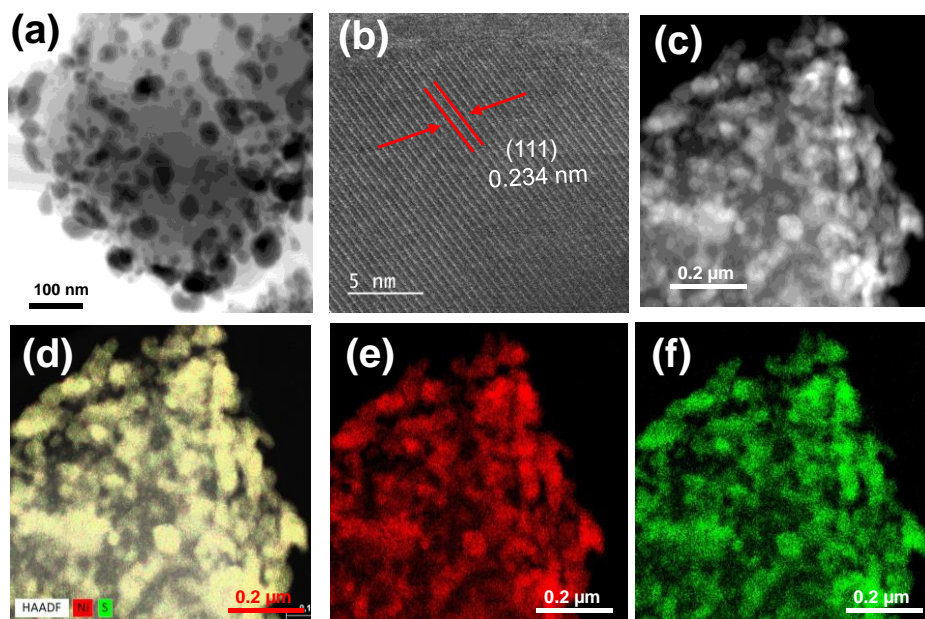

**Fig. S3.** (a) TEM overview image of the spent  $\text{Ni}_3\text{S}_2/\text{C}$  catalyst, (b) HRTEM image of a single nanoparticle, showing lattice fringes, (c) HAADF-STEM image with (d-f) EDX mapping of nanoparticles on HAADF-STEM image in (c) with element maps of (d) combined Ni and S, (e) Ni (red), and (f) S (green).

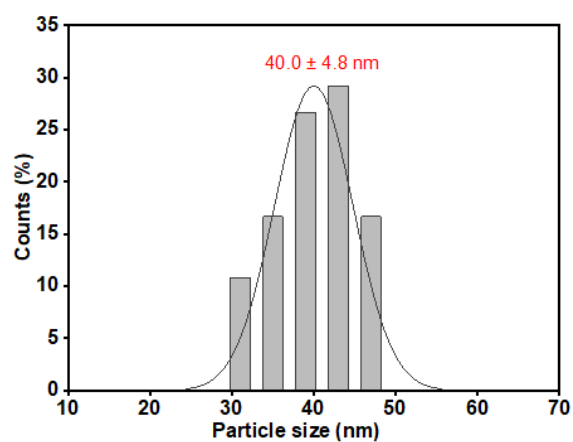

**Fig. S4.** Particle size distribution plot of the spent  $\text{Ni}_3\text{S}_2/\text{C}$  catalyst, determined by TEM imaging.

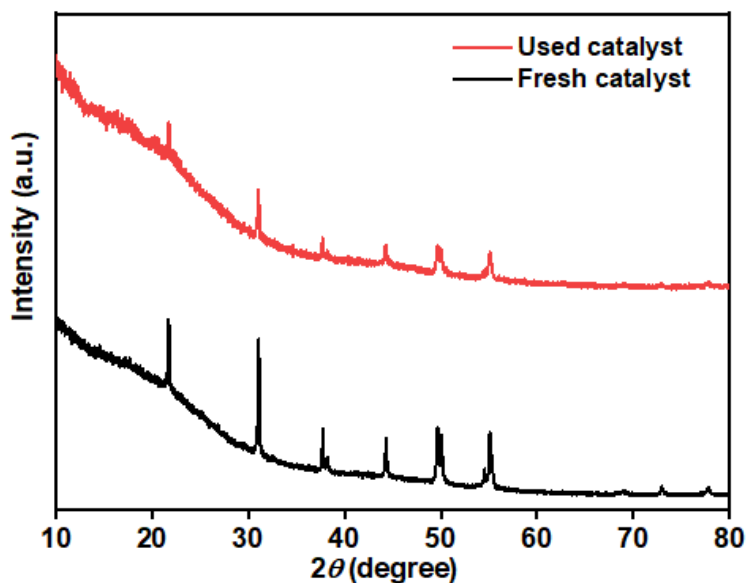

Fig. S5. Powder X-ray diffractogram of the spent and fresh  $\text{Ni}_3\text{S}_2/\text{C}$  catalyst.

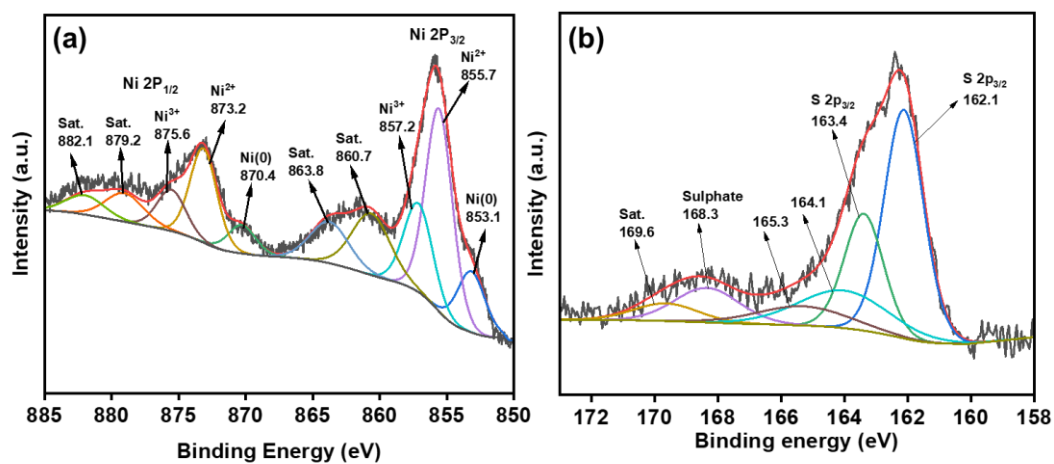

Fig. S6. XPS spectra (a) Ni 2p and (b) S 2p region of spent  $\text{Ni}_3\text{S}_2/\text{C}$  catalyst.

### 3. GC-MS analysis

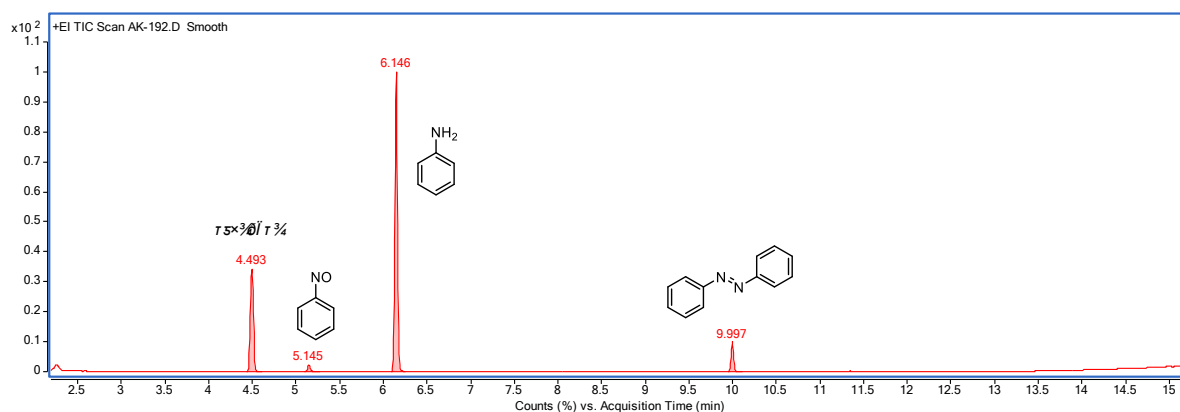

**Fig. S7.** Catalytic transfer hydrogenation of nitrobenzene to aniline over  $\text{Ni}_3\text{S}_2/\text{C}$ . Reaction conditions: nitrobenzene (1 mmol),  $\text{Ni}_3\text{S}_2/\text{C}$  (30 mg, 10 wt%), *n*-heptane (2 mL), 70 °C, hydrazine monohydrate (10 equiv.), 6 h.

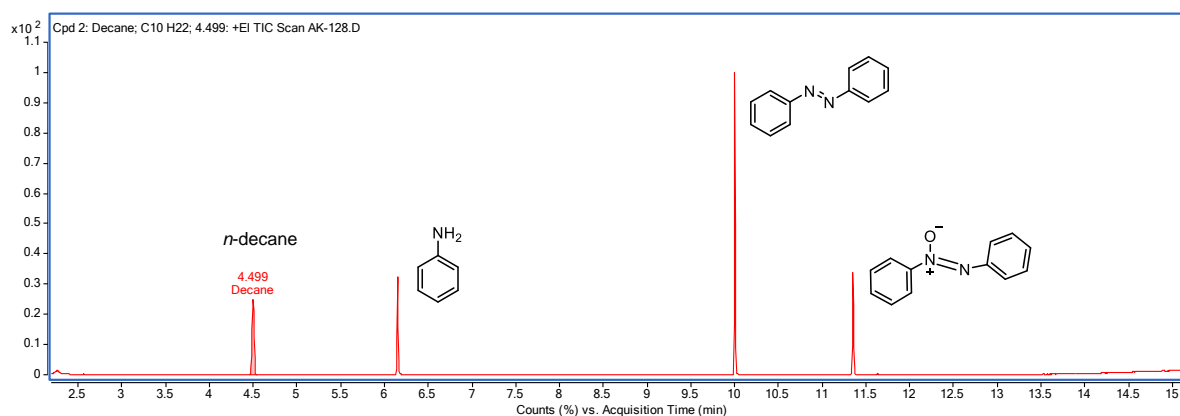

**Fig. S8.** Catalytic transfer hydrogenation of nitrobenzene to aniline over  $\text{Ni}/\text{C}$ . Reaction conditions: nitrobenzene (1 mmol),  $\text{Ni}/\text{C}$  (30 mg, 10 wt%), *n*-heptane (2 mL), 70 °C, hydrazine monohydrate (10 equiv.), 2 h.

#### 4. Catalytic test results

**Table S2.** Effect of the temperature in the transfer hydrogenation of nitrobenzene.<sup>a</sup>

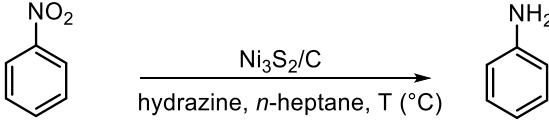

| entry | T (°C) | t (h) | Conv. (%) | Aniline yield (%) |
|-------|--------|-------|-----------|-------------------|
| 1     | 30     | 2     | -         | -                 |
| 2     | 40     | 2     | 21        | 11                |
| 3     | 50     | 2     | 40        | 12                |
| 4     | 60     | 2     | 60        | 40                |
| 5     | 70     | 2     | >99       | 64                |

<sup>a</sup>Reaction conditions: nitrobenzene (0.97 mmol, 0.1 mL), catalyst (30 mg, 10 wt% Ni), *n*-heptane (2 mL), 30-70 °C, hydrazine monohydrate (10 equiv.). Conversion, selectivity and yield were calculated by GC-MS with *n*-decane as external standard.

**Table S3.** Effect of the catalyst loading in the transfer hydrogenation of nitrobenzene.<sup>a</sup>

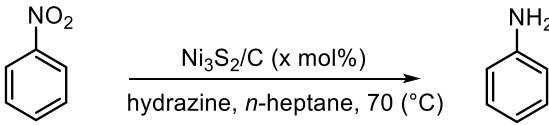

| entry | Catalyst loading (mol%) | t (h) | Conv. (%) | Aniline yield (%) |
|-------|-------------------------|-------|-----------|-------------------|
| 1     | 0.87                    | 2     | 65        | 35                |
| 2     | 1.73                    | 2     | 85        | 33                |
| 3     | 3.47                    | 2     | >99       | 45                |
| 4     | 5.2                     | 2     | >99       | 64                |

<sup>a</sup>Reaction conditions: nitrobenzene (0.97 mmol, 0.1 mL), catalyst (0.87-5.2 mol%), *n*-heptane (2 mL), 70 °C, hydrazine monohydrate (10 equiv.). Conversion, selectivity and yield were calculated by GC-MS with *n*-decane as external standard.

**Table S4.** Effect of the hydrazine amount in the transfer hydrogenation of nitrobenzene.<sup>a</sup>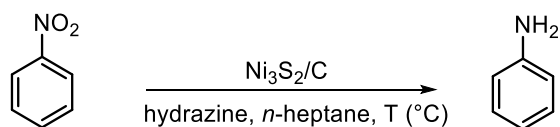

| entry | Hydrazine (equiv.) | t (h) | Conv. (%) | Aniline yield (%) |
|-------|--------------------|-------|-----------|-------------------|
| 1     | 2                  | 2     | 40        | 23                |
| 2     | 4                  | 2     | 68        | 28                |
| 3     | 6                  | 2     | 88        | 44                |
| 4     | 8                  | 2     | 94        | 52                |
| 5     | 10                 | 2     | >99       | 64                |

<sup>a</sup>Reaction conditions: nitrobenzene (0.97 mmol, 0.1 mL), catalyst (30 mg, 10 wt% Ni), *n*-heptane (2 mL), 30-70 °C, hydrazine monohydrate (2-10 equiv.). Conversion, selectivity and yield were calculated by GC-MS with *n*-decane as external standard.

**Table S5.** Effect of the hydrogen source in the transfer hydrogenation of nitrobenzene.<sup>a</sup>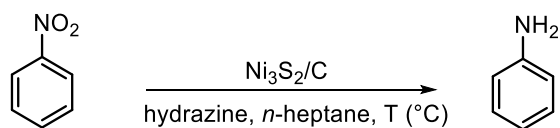

| entry | Hydrogen source | t (h) | Conv. (%) | Aniline yield (%) |
|-------|-----------------|-------|-----------|-------------------|
| 1     | methanol        | 2     | -         | -                 |
| 2     | ethanol         | 2     | -         | -                 |
| 3     | Formic acid     | 2     | -         | -                 |
| 4     | isopropanol     | 2     | -         | -                 |
| 5     | hydrazine       | 2     | >99       | 64                |

<sup>a</sup>Reaction conditions: nitrobenzene (0.97 mmol, 0.1 mL), catalyst (30 mg, 10 wt% Ni), *n*-heptane (2 mL), 30-70 °C, hydrogen source (10 equiv.). Conversion, selectivity and yield were calculated by GC-MS with *n*-decane as external standard.

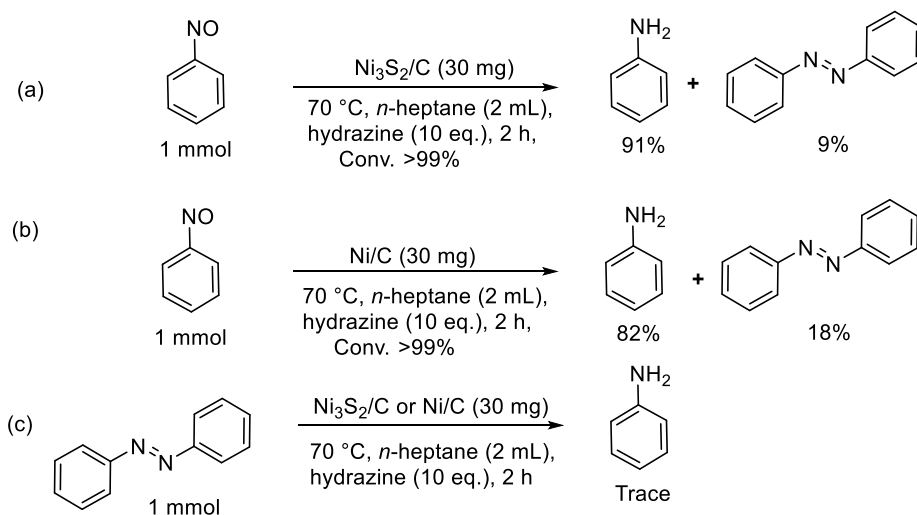

**Scheme S1.** Control experiments to investigate the reaction pathway in the catalytic transfer hydrogenation of nitrosobenzene over (a)  $\text{Ni}_3\text{S}_2/\text{C}$ , (b)  $\text{Ni}/\text{C}$  and (c) azobenzene over  $\text{Ni}_3\text{S}_2/\text{C}$  and  $\text{Ni}/\text{C}$ .

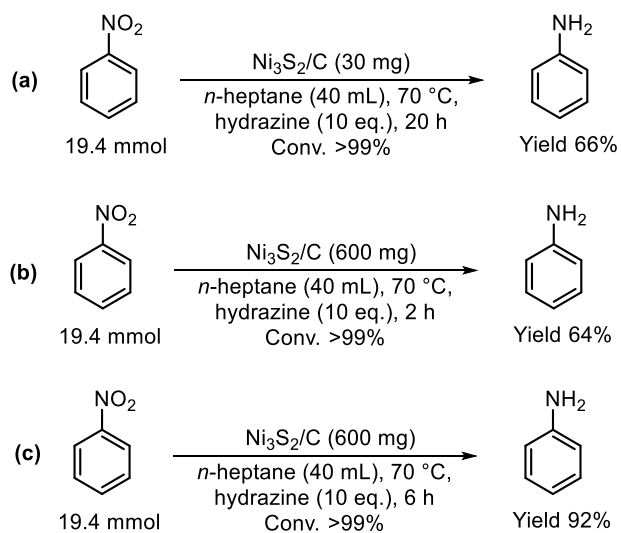

**Scheme S2.** Gram-scale experiment for the catalytic transfer hydrogenation of nitrobenzene to aniline over  $\text{Ni}_3\text{S}_2/\text{C}$ .

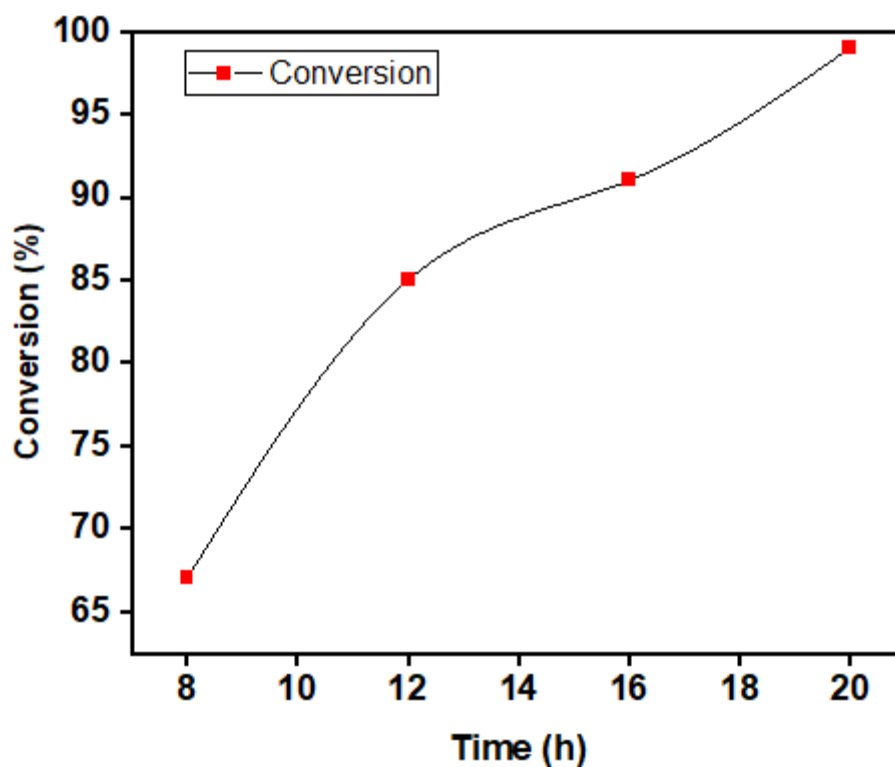

**Fig. S9.** Time-dependent conversion for the gram-scale reaction. Reaction conditions: nitrobenzene (19.4 mmol), Ni<sub>3</sub>S<sub>2</sub>/C (30 mg), *n*-heptane (40 mL), hydrazine monohydrate (10 equiv.) and 70 °C.

| <b>Table S6.</b> Comparison of the catalytic activity for nitrobenzene transfer hydrogenation. |                                   |       |           |                   |
|------------------------------------------------------------------------------------------------|-----------------------------------|-------|-----------|-------------------|
| entry                                                                                          | Catalyst                          | t (h) | Conv. (%) | Aniline yield (%) |
| 1                                                                                              | Ni <sub>3</sub> S <sub>2</sub> /C | 2     | >99       | 64                |
| 2                                                                                              | Ni <sub>2</sub> P-AC              | 2     | >99       | 93                |

<sup>a</sup>Reaction conditions: nitrobenzene (0.97 mmol, 0.1 mL), catalyst (30 mg), *n*-heptane (2 mL), 70 °C, hydrazine monohydrate (10 equiv.).

## 5. References

1. H. Jin, P. Li, P. Cui, J. Shi, W. Zhou, X. Yu, W. Song and C. Cao, *Nat. Commun.*, 2022, **13**, 1-9.
2. V. Goyal, N. Sarki, B. Saint, A. Ray, M. Poddar, A. Bordoloi, A. Narani and K. Natte, *ACS Appl. Nano Mater.*, 2020, **3**, 11070-11079.
3. Y. Zhou, A. Guo, H. Shen, Y. Wang, F. Zhang, X. Rong, Y. Li, X. Yan, L. Chen and B. Wang, *ChemCatChem*, 2025, **17**, e202401902.
4. Z. Ma, J. Chen, M. Chen, L. Dong, W. Mao, Y. Long and J. Ma, *ChemCatChem*, 2024, **16**, e202400336.
5. S. Dey, D. Panja, A. Sau, S. D. Thakur and S. Kundu, *J. Org. Chem.*, 2023, **88**, 10048-10057.
6. S. Dey, S. D. Thakur, A. Sau, D. Panja, T. Roy, J. Zhang, H. V. Annadata and S. Kundu, *J. Catal.*, 2024, **439**, 115759.
7. G. Zhang, L. Liu, Q. Zhu and X. Kong, *Catal. Lett.*, 2023, **153**, 1536-1542.
8. N. M. Patil, T. Sasaki and B.M. Bhanage, *ACS Sustain. Chem. Eng.*, 2016, **4**, 429-436.
9. M. Yuan, Y. Long, J. Yang, X. Hu, D. Xu, Y. Zhu, and Z. Dong, *ChemSusChem* 2018, **11**, 4156 – 4165.
10. D. Sharma, P. Choudhary, S. Kumar and V. Krishnan, *J. Colloid Interface Sci.*, 2024, **657**, 449-462.
11. F. Yang, M. Wang, W. Liu, B. Yang, Y. Wang, J. Luo, Y. Tang, L. Hou, Y. Li, Z. Li, B. Zhang, W. Yang and Y. Li, *Green Chem.*, 2019, **21**,704-711.
12. Y. Qu, H. Yang, S. Wang, T. Chen and G. Wang, *Catal. Commun.*, 2017, **97**, 83-87.
13. C. Jiang, Z. Shang, and X. Liang, *ACS Catal.* 2015, **5**, 4814–4818.
14. X. Li, R. Sun, L. Zhao, J. Wang, Z. Wang, W. Li and X. Wang, *Appl. Organomet. Chem.*, 2025, **39**, e7974.
15. N. Sarki, R. Kumar, B. Singh, A. Ray, G. Naik, K. Natte and A. Narani, *ACS Omega*, 2022, **7**, 19804-19815.
16. Y. Sun, A.J. Darling, Y. Li, K. Fujisawa, C.F. Holder, H. Liu, M.J. Janik, M. Terrones, R.E. Schaak, *Chem. Science*, 2019, **10**, 10310-10317.
17. Y. Sheng, X. Lin, S. Yue, Y. Liu, X. Zou, X. Wang and X. Lu, *Mater. Adv.*, 2021, **2**, 6722-6730.
18. N. M. Patil, T. Sasaki and B.M. Bhanage, *ACS Sustain. Chem. Eng.*, 2016, **4**, 429-436.
19. J. P. Southouse, L. Lazzarini, A. O. Ibhaddon and M. G. Francesconi, *New J. Chem.*, 2021, **45**, 17808-17815.
20. J. Yu, X. Zhang, R. Jiang, W. He, M. Xu, X. Xu, Q. Xiang, C. Yin, Z. Xiang, C. Ma, Y. Liu, X. Li and C. Lu, *ACS Appl. Mater. Interfaces*, 2024, **16**, 8603-8615.

21. K. Martina, M. J. Moran, M. Manzoli, M. V. Trukhan, S. Kuhn, T. V. Gerven and G. Cravotto, *Org. Process Res. Dev.*, 2024, **28**, 1515-1528.
22. S. Yan, Y. Guo, L. P. Xiao, X. Chen and R. C. Sun, *Chem. Select*, 2020, **5**, 7249-7253.
23. V. Goyal, N. Sarki, M. K. Poddar, A. Narani, D. Tripathi, A. Ray and K. Natte, *New J. Chem.*, 2021, **45**, 14687-14694.
24. H. Liao, P. Weng, H. Huang, R. Tan, R. Zhu, Y. Liu and Z. Wang, *RSC Adv.*, 2023, **13**, 20876.
25. Q. Liu, H. Fu, W. Wang, L. Zhu, Y. Fang, Z. Yang, A. Kroner, H. Ye and B. H. Chen, *ACS Appl. Nano Mater.*, 2024, **7**, 22517-22524.
26. J. Li, S. Wang, Z. Yu, H. Zhang, L. Zhu, C. Wu and H. Yu, *Ind. Eng. Chem. Res.*, 2025, **64**, 10844-10851.
27. Y. Qu, H. An, X. Zhao and Y. Wang, *Chem. Eng. J.*, 2024, **496**, 153949.
28. Q. Zhang, J. Bu, J. Wang, C. Sun, D. Zhao, G. Sheng, X. Xie, M. Sun and L. Yu, *ACS Catal.*, 2020, **10**, 10350-10363.
29. H. Tian, J. Zhou, Y. Li, Y. Wang, L. Liu, Y. Ai, Z. N. Hu, J. Li, R. Guo, Z. Liu, H. Sun and Q. liang, *ChemCatChem*, 2019, **11**, 5543-5552.
30. D. G. Vera, T. M. Bustamante, J. N. D. Leon, R. Dinamarca, R. Morales, P. A. Osorio-Vargas, C. C. Torres, C. H. Campos, *Mater. Today Commun.*, *Mat. Today Commun.*, 2020, **24**, 101091.
31. R. Qu, M. Macino, S. Iqbal, X. Gao, Q. He, G. J. Hutchings and M. Sankar, *Nanomaterials*, 2018, **8**, 690.
